# Supplementary material for: Multimodal chemical imaging of molecular messengers in emerging Pseudomonas aeruginosa bacterial communities
Source: Royal Society of Chemistry journal article supplement (doi:10.1039/c5an01149c), 2015-01-01

## Multi-Modal Chemical Imaging of Molecular Messengers in Emerging *Pseudomonas aeruginosa* Microbial Communities

Nameera F. Baig<sup>1\*</sup>, Sage J. B. Dunham<sup>2\*</sup>, Nydia Morales-Soto<sup>3</sup>, Joshua D. Shrout<sup>3</sup>, Jonathan V. Sweedler<sup>2,y</sup>, and Paul W. Bohn<sup>1,y</sup>

<sup>1</sup>Department of Chemistry and Biochemistry and Department of Chemical and Biomolecular Engineering, University of Notre Dame, Notre Dame, IN 46556

<sup>2</sup>Department of Chemistry and Beckman Institute for Advanced Science and Technology, University of Illinois at Urbana-Champaign, Urbana, IL 61801

<sup>3</sup>Department of Civil and Environmental Engineering and Earth Sciences and Department of Biological Sciences, University of Notre Dame, Notre Dame, IN 46556

### Supplemental Information

**Figure S1.** Tandem mass spectrometry of analytes from **Table 1**

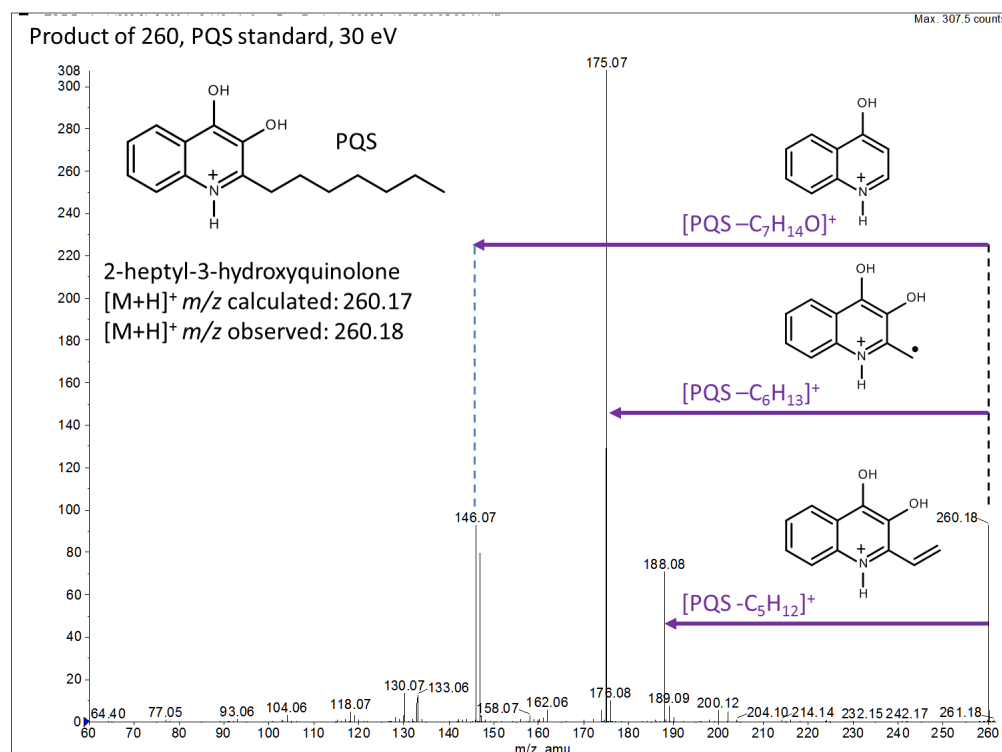

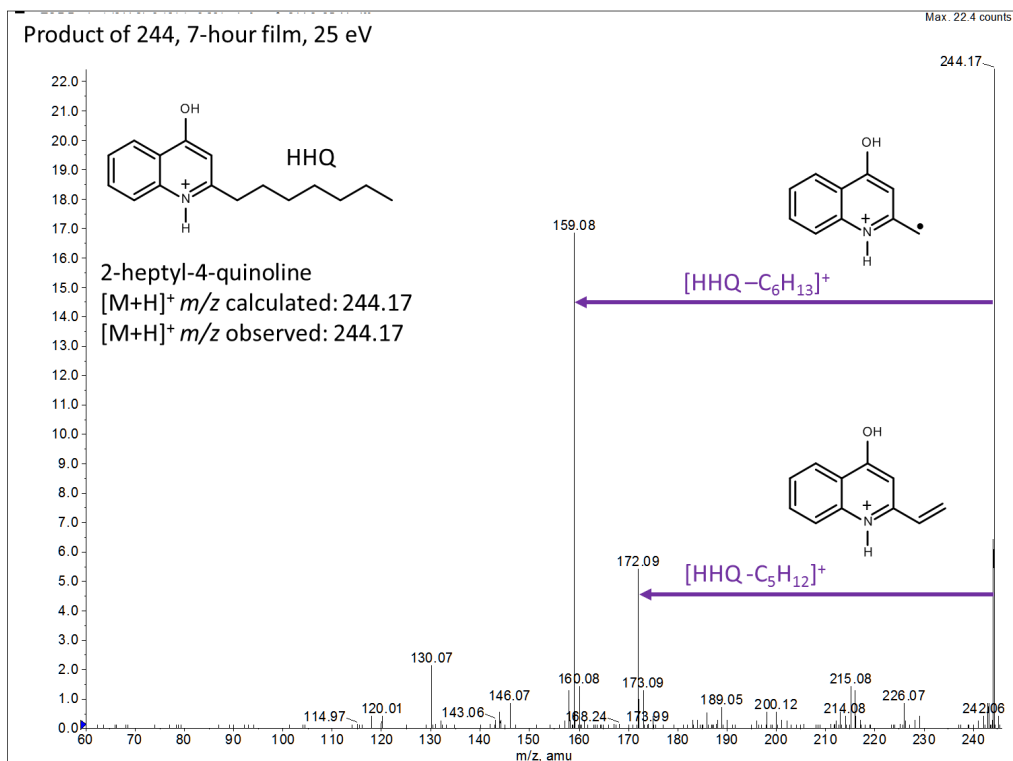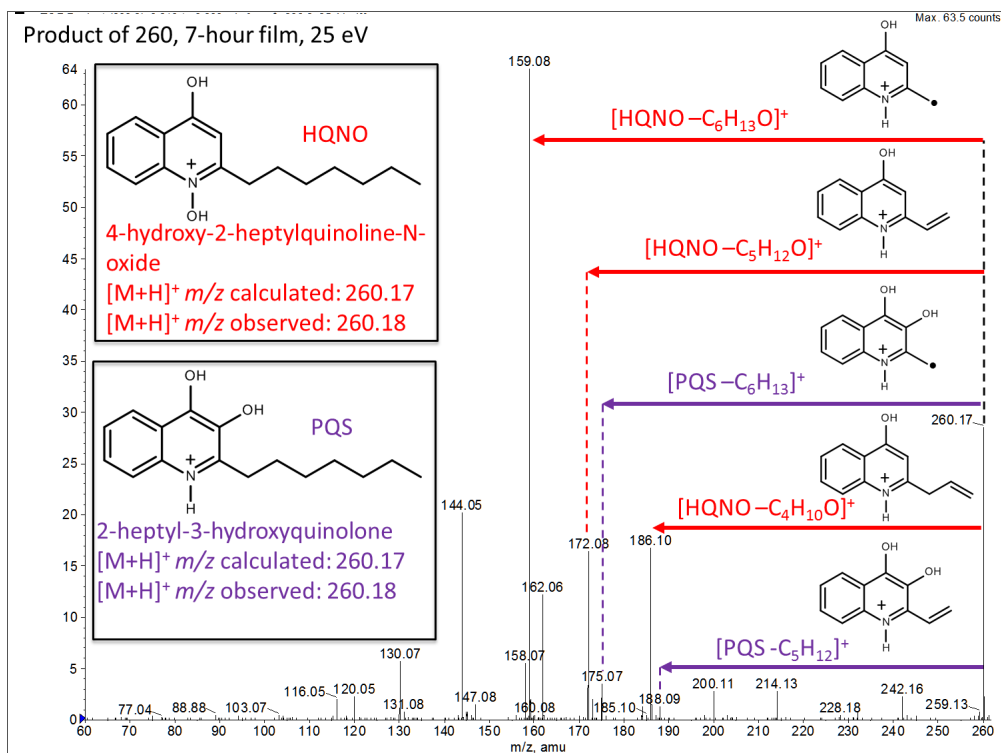

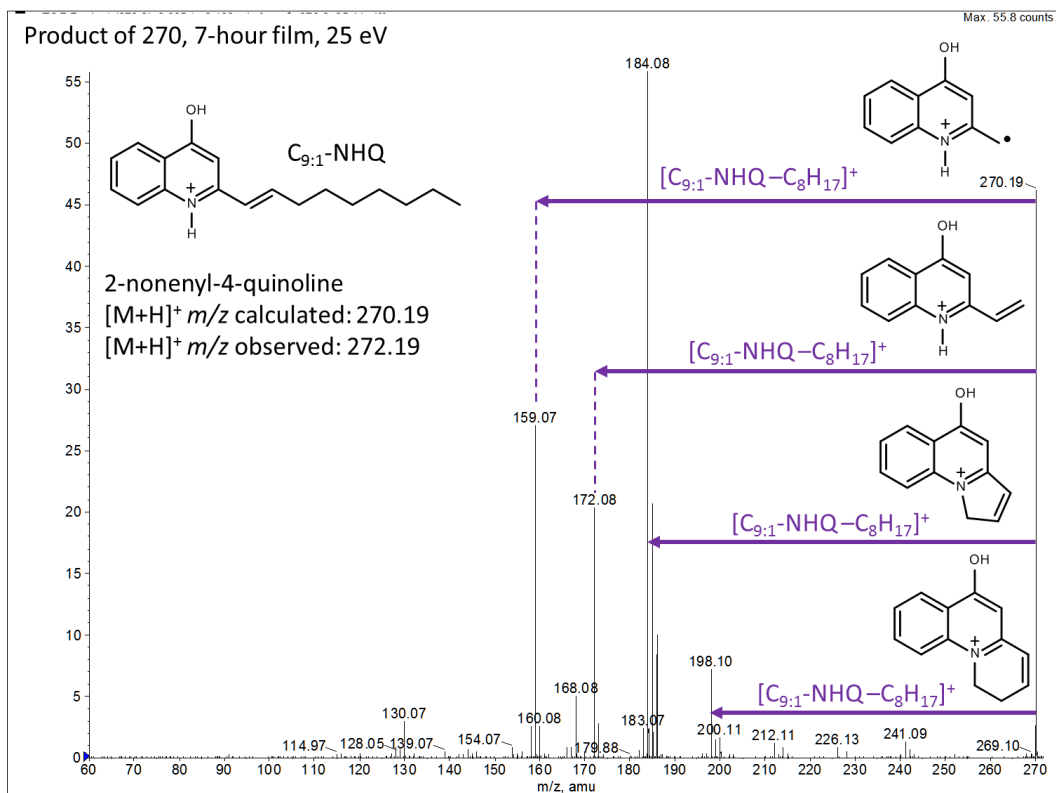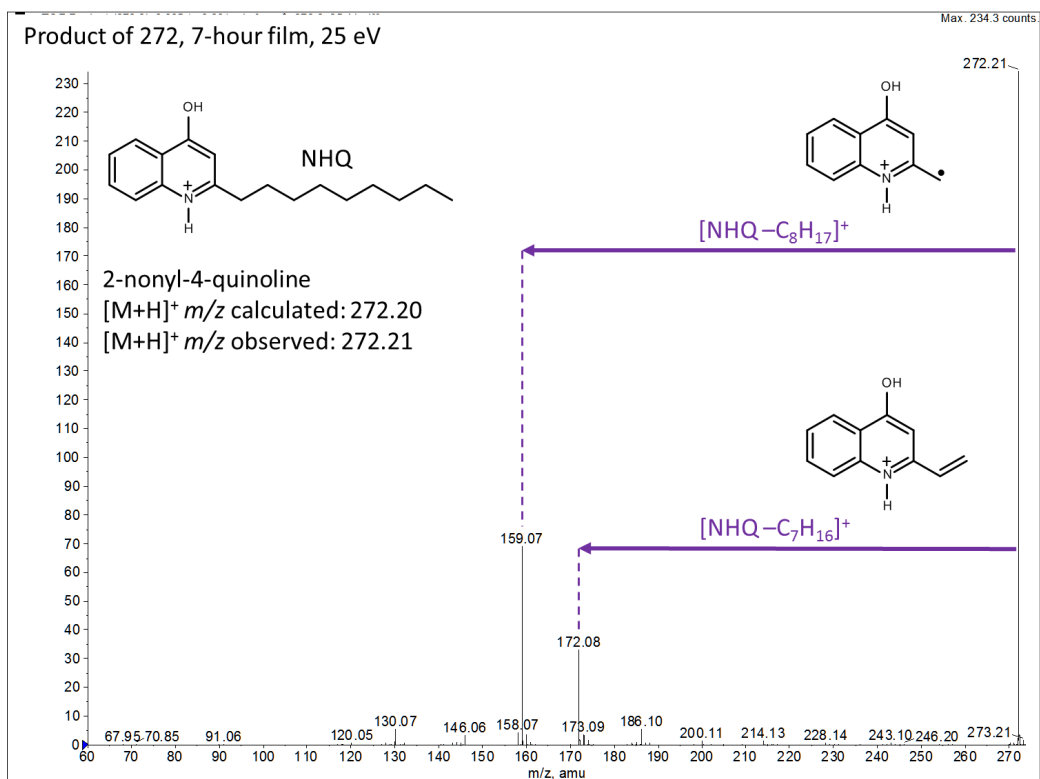

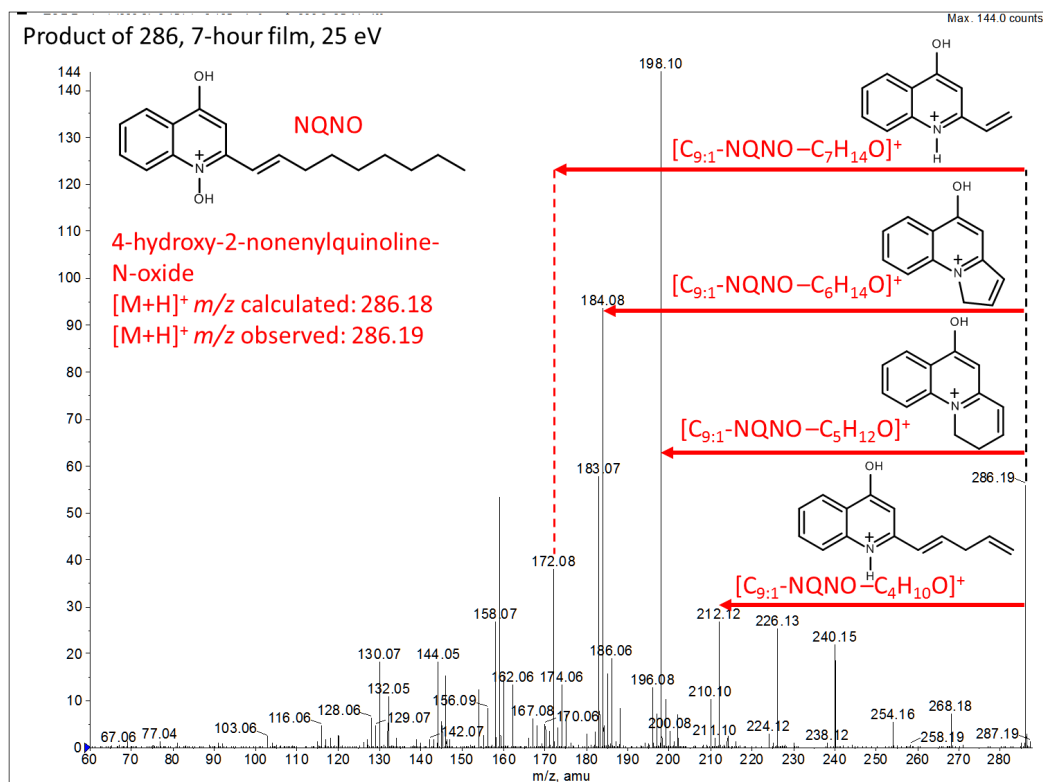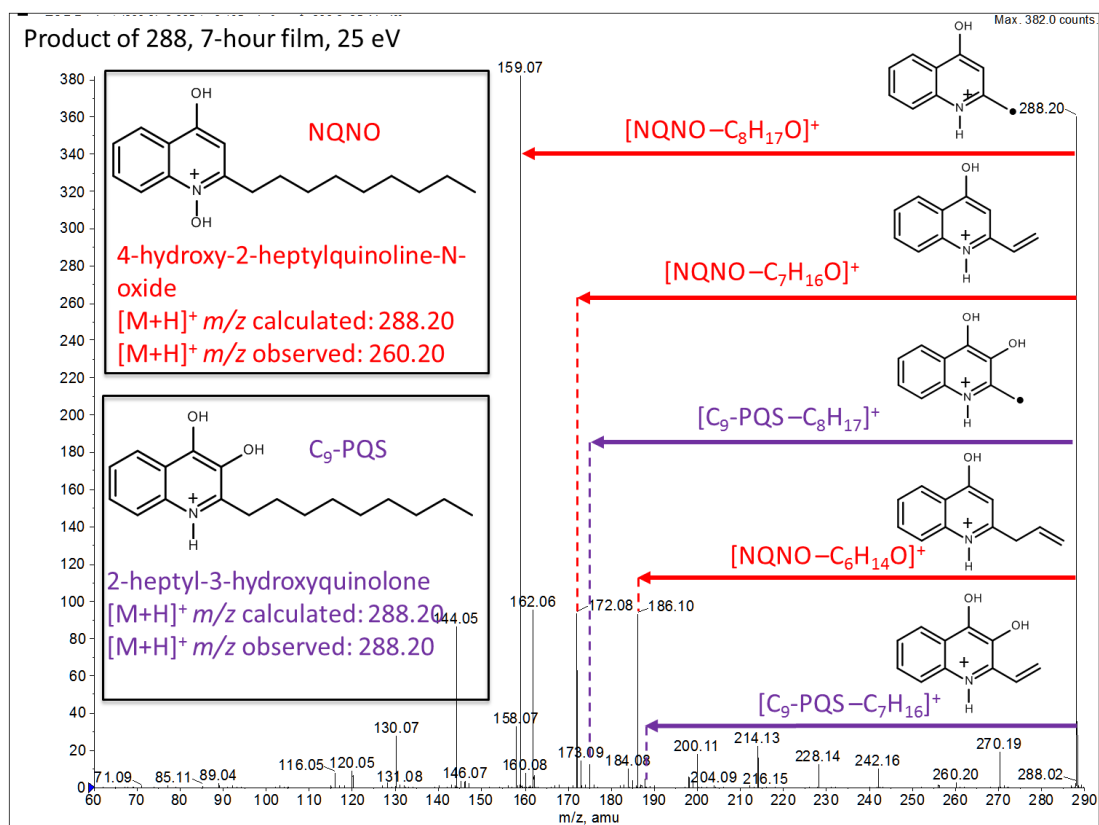

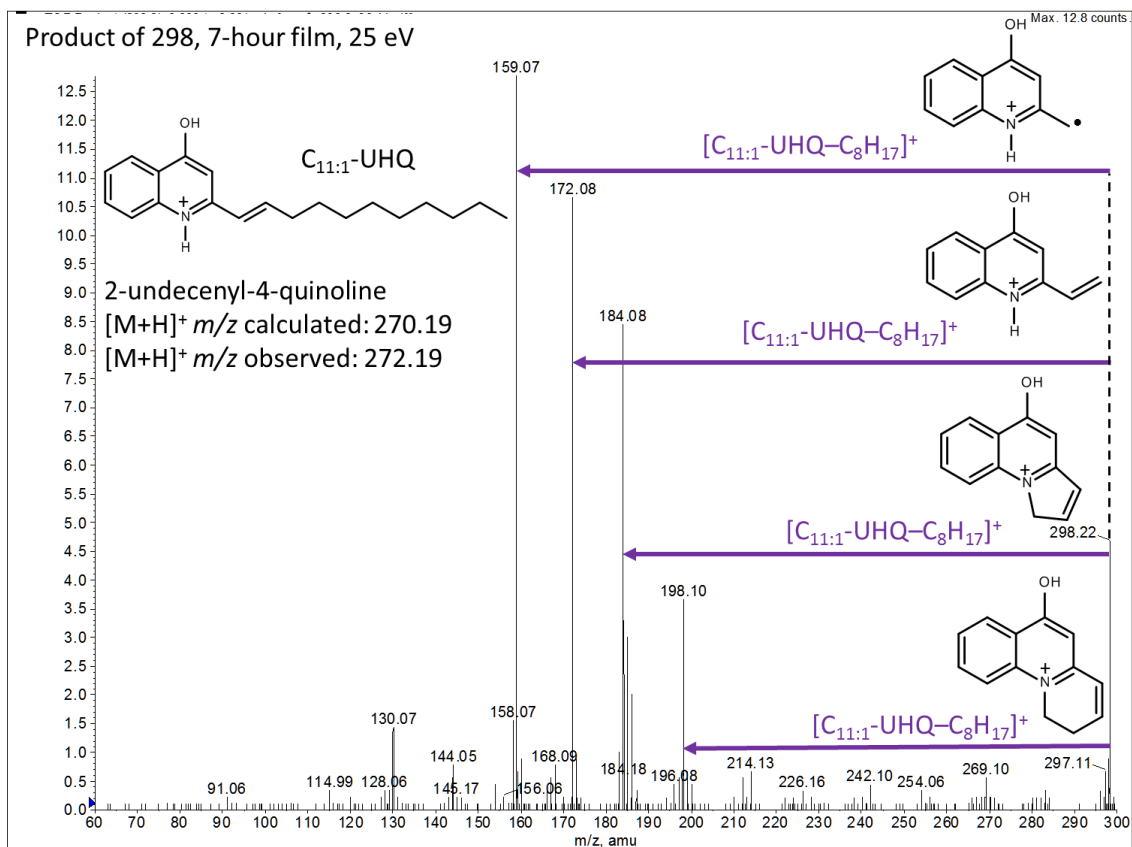

**Figure S2.** Line-scans of  $m/z$  288.21 on the 7-hour biofilm of **Figure 2**.

7-hour biofilm,  $C_9$ -PQS/NQNO ( $m/z$  288.21)

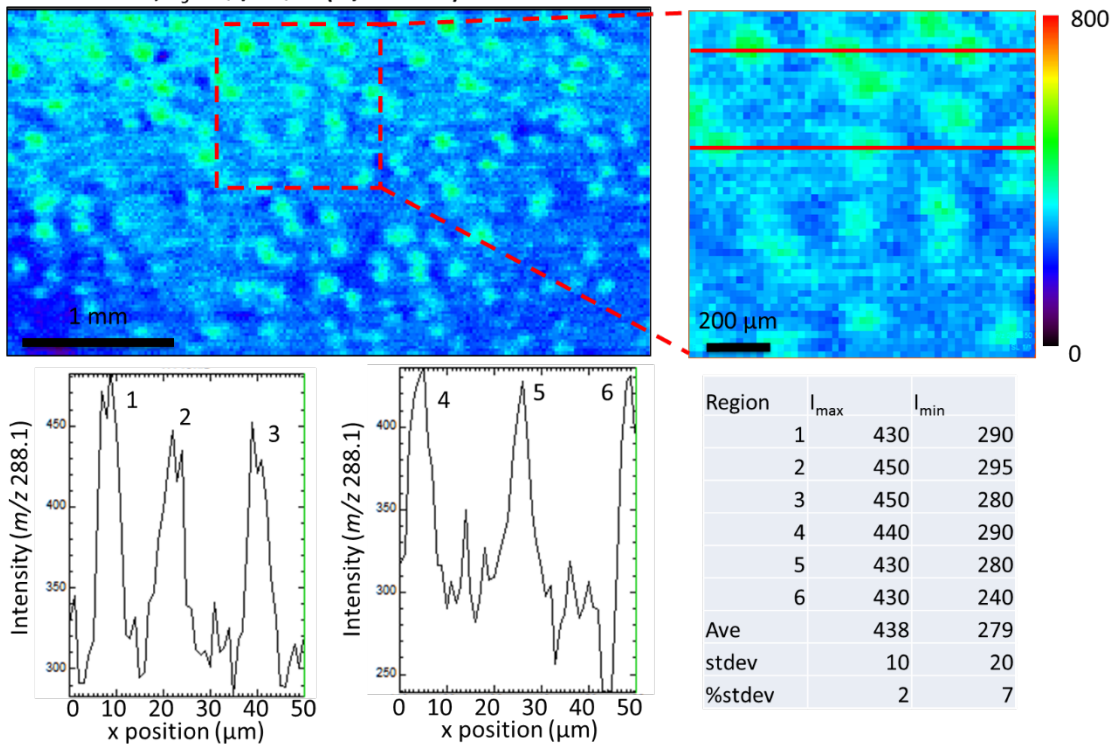

**Figure S3.** Raman spectra of quiolone standards (i) HQNO and (ii) PQS.

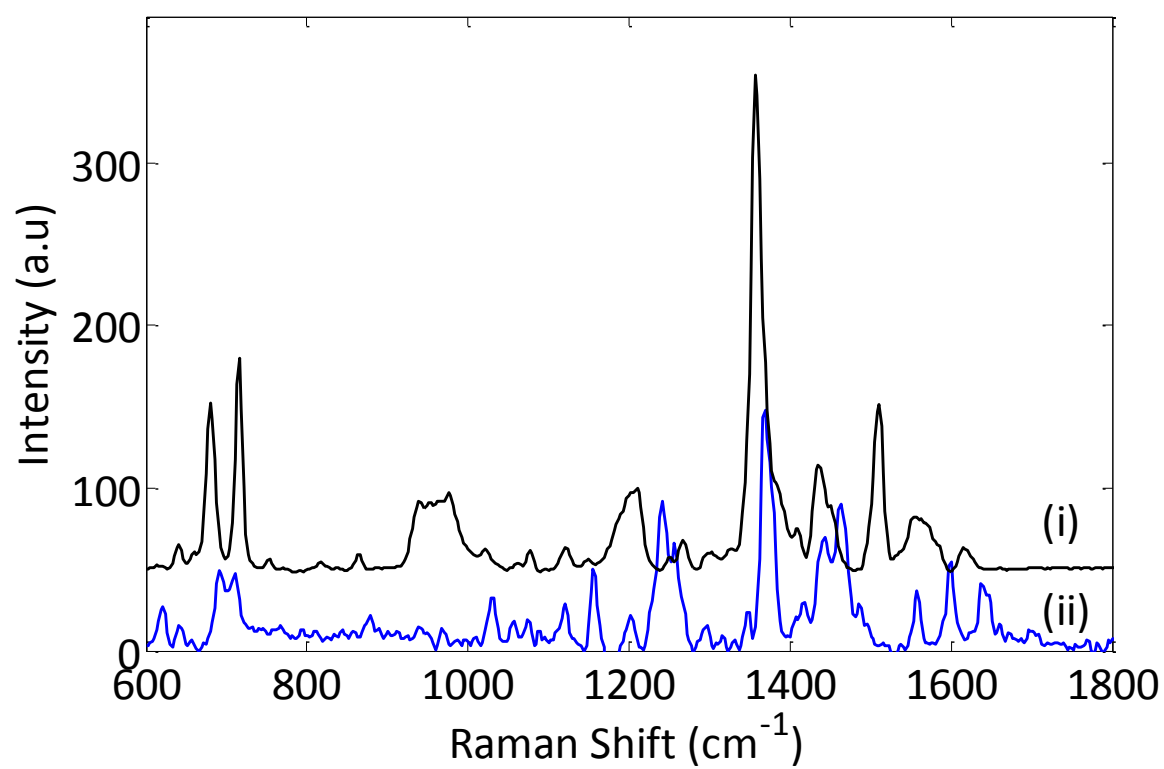

Supplement: c5an01149c1.pdf [file c5an01149c1.pdf]
